# Supplementary material for: Gut Microbiome of the Canadian Arctic Inuit
Source: PubMed Central journal article supplement (PMC5214747; doi:10.1128/msphere.00297-16), 2017-01-04

**A**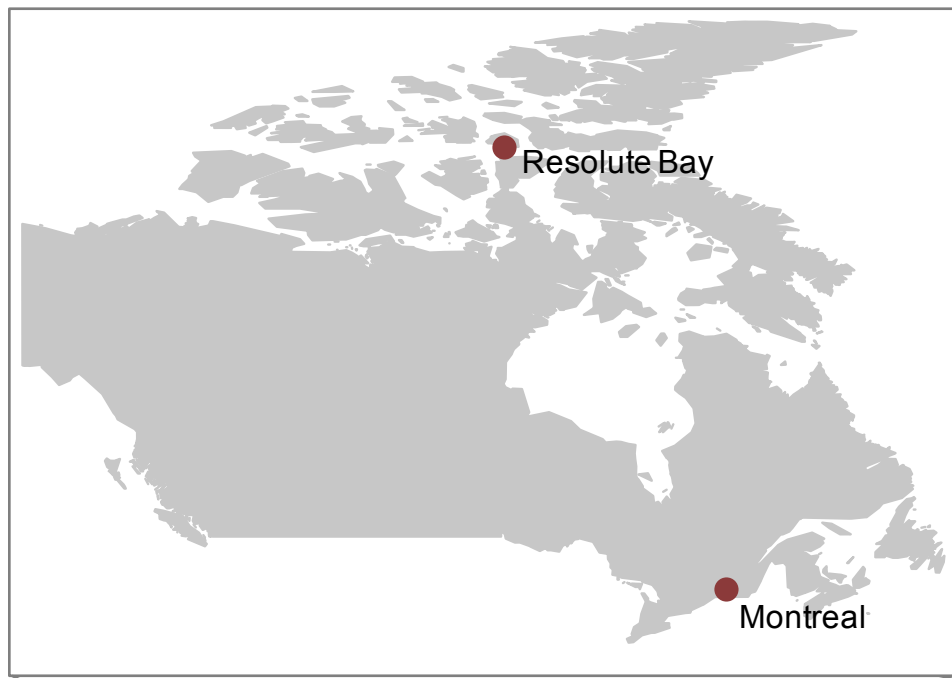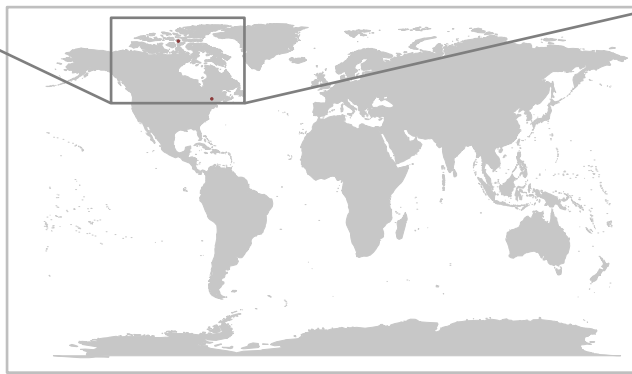**B**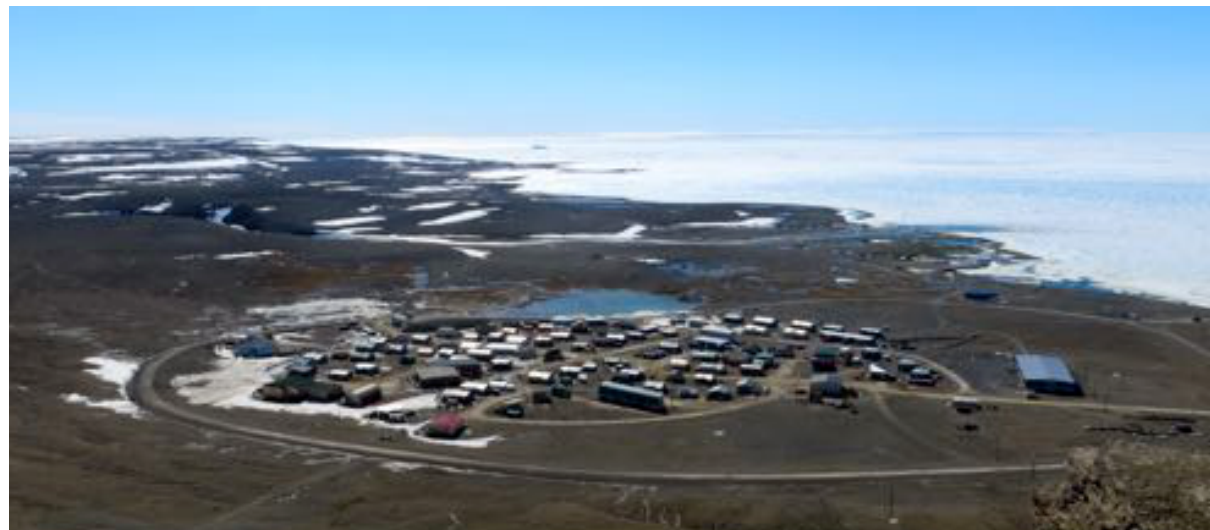**C**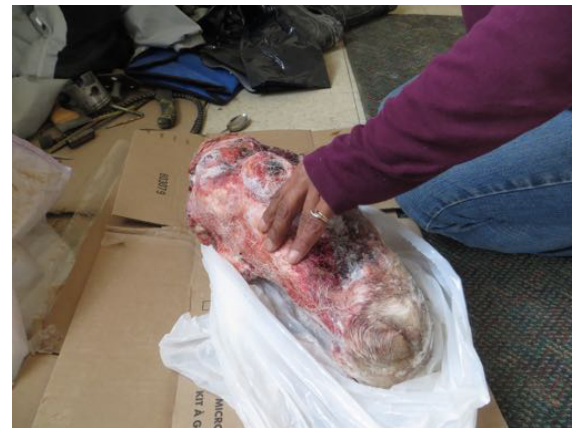**D**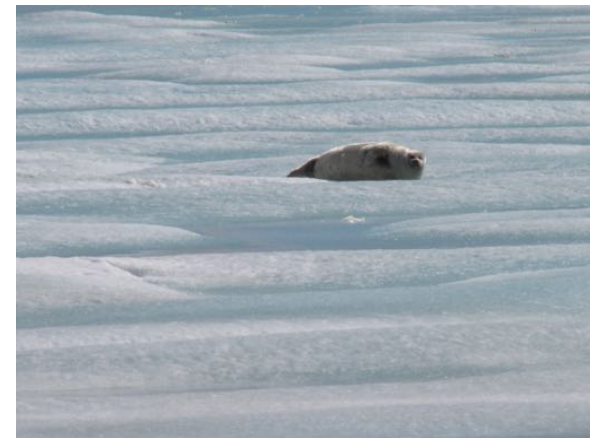

Supplement: sph001172219sf2.pdf [file sph001172219sf2.pdf]
