# Supplementary material for: Gut Microbiome of the Canadian Arctic Inuit
Source: PubMed Central journal article supplement (PMC5214747; doi:10.1128/msphere.00297-16), 2017-01-04
Supplement: sph001172219sf3.pdf [file sph001172219sf3.pdf]

Observed

Shannon

Simpson

Fisher

## A. Geography

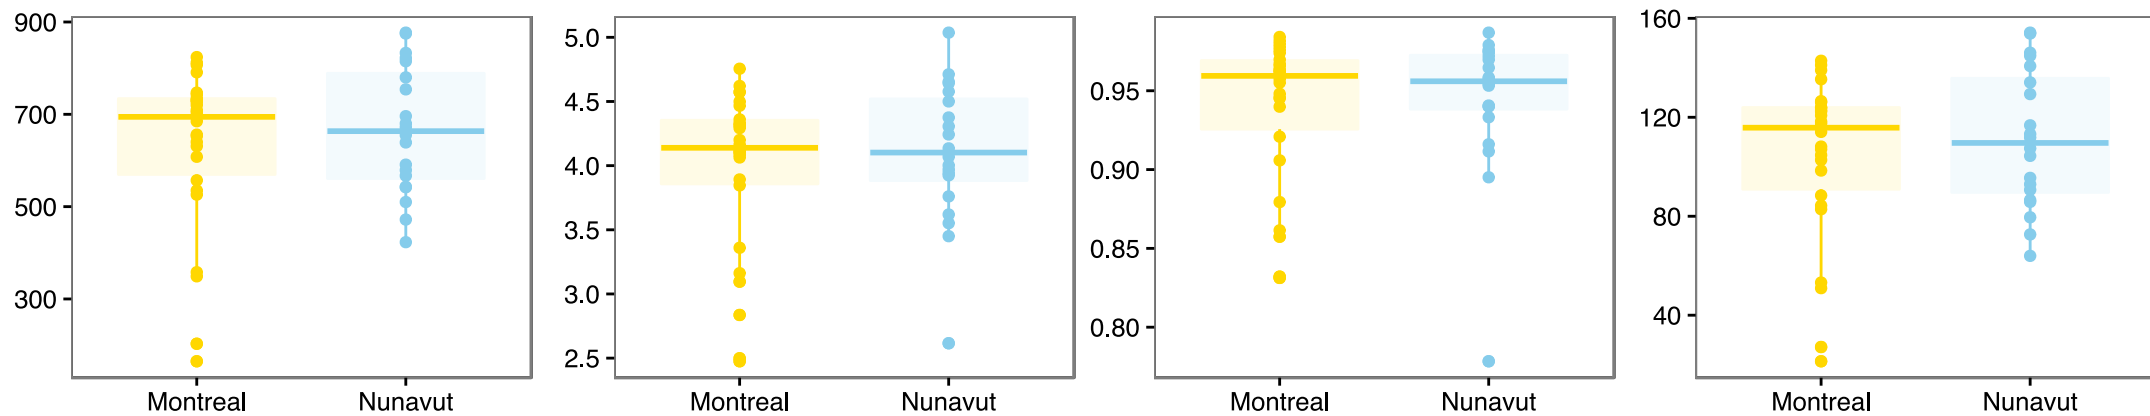

## B. Diet

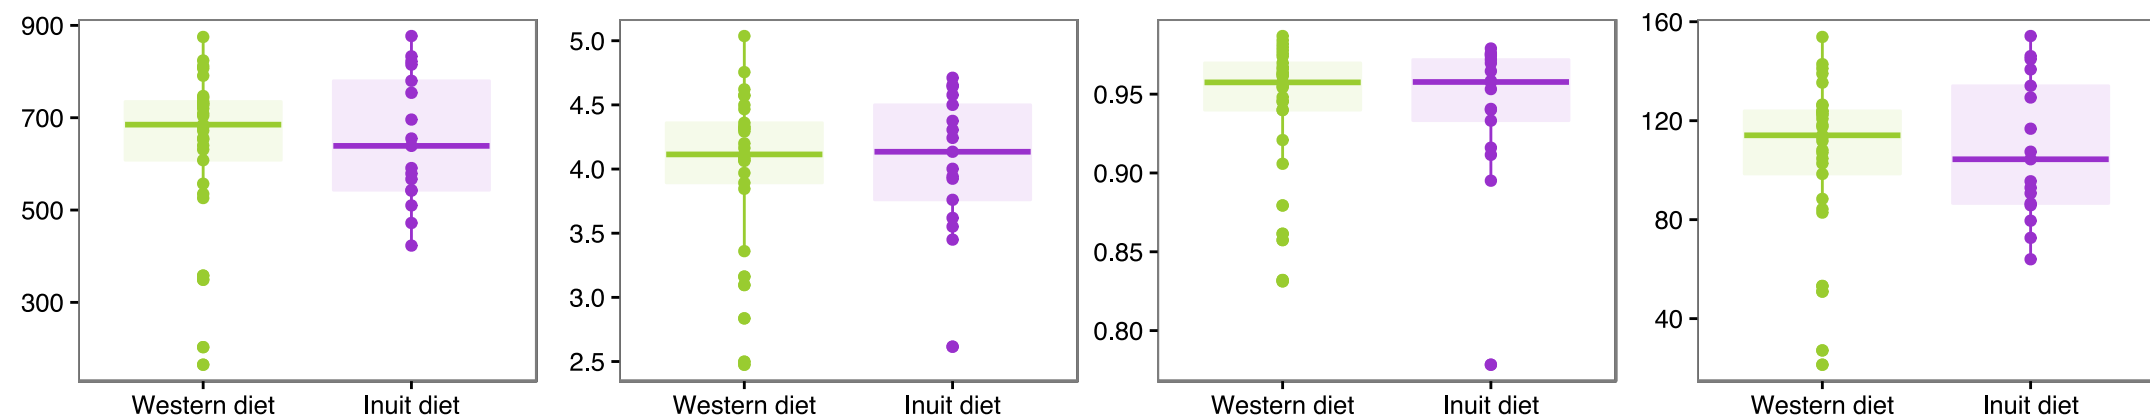

## C. Diet within Nunavut

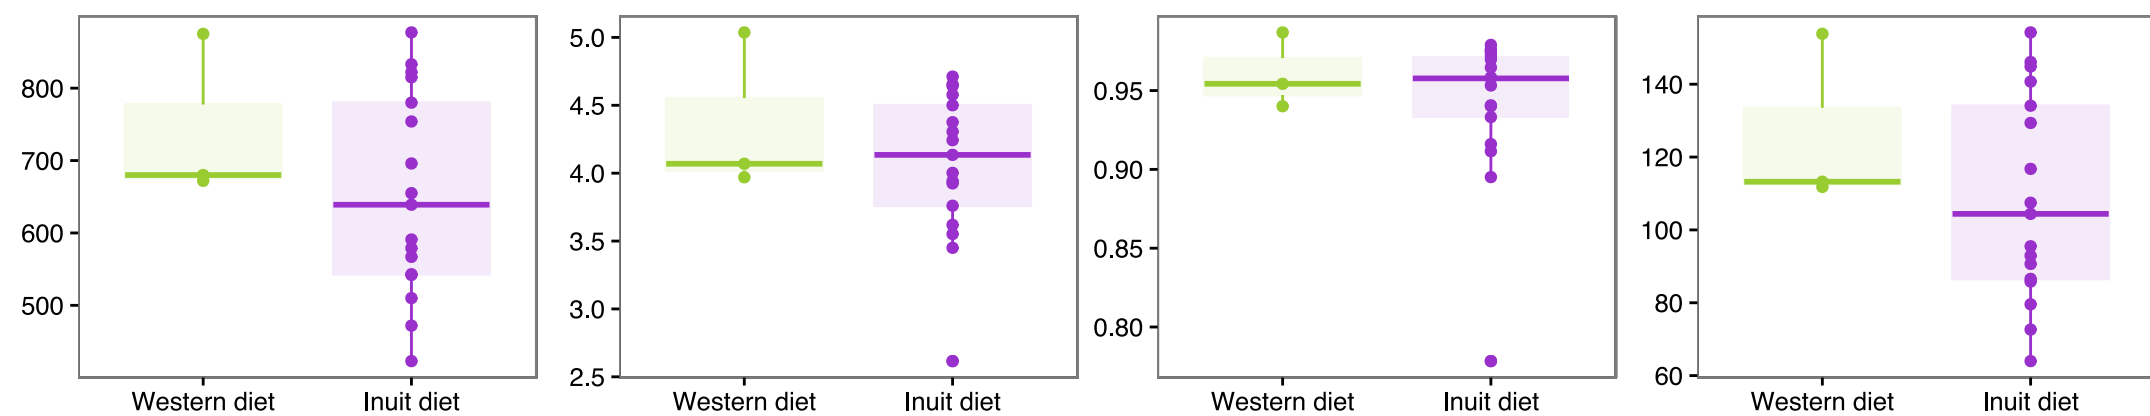

## D. BMI

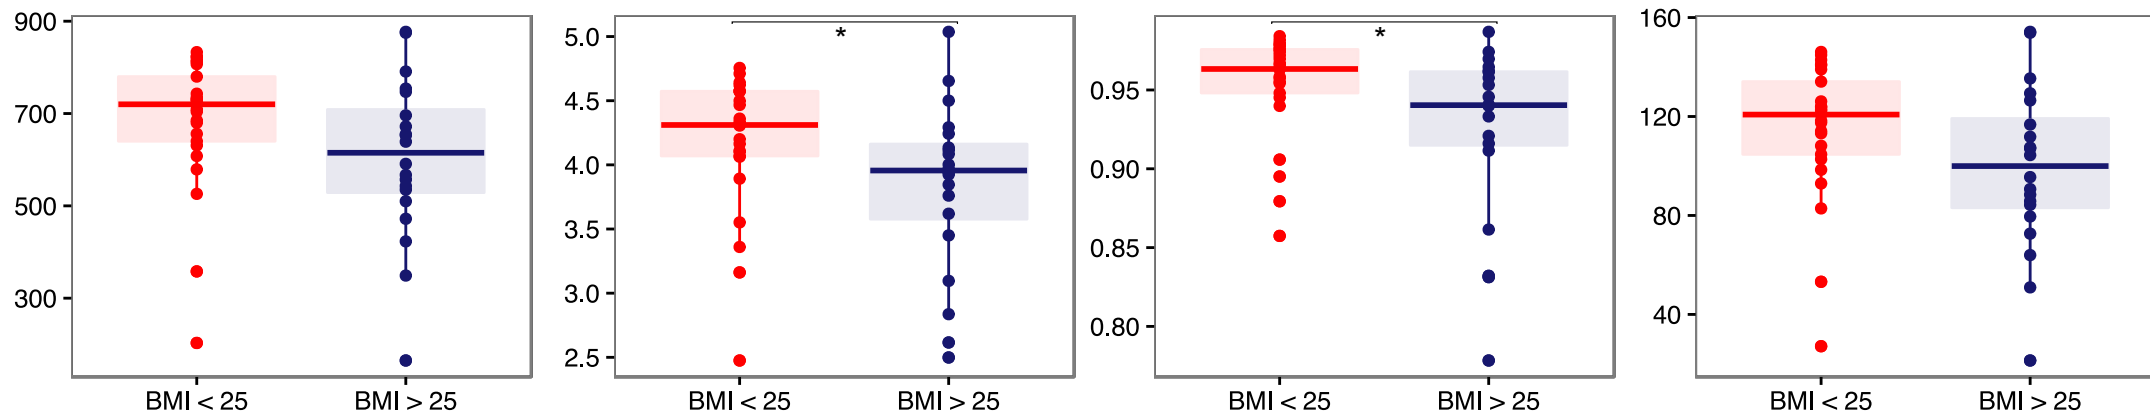

## E. Ethnic group

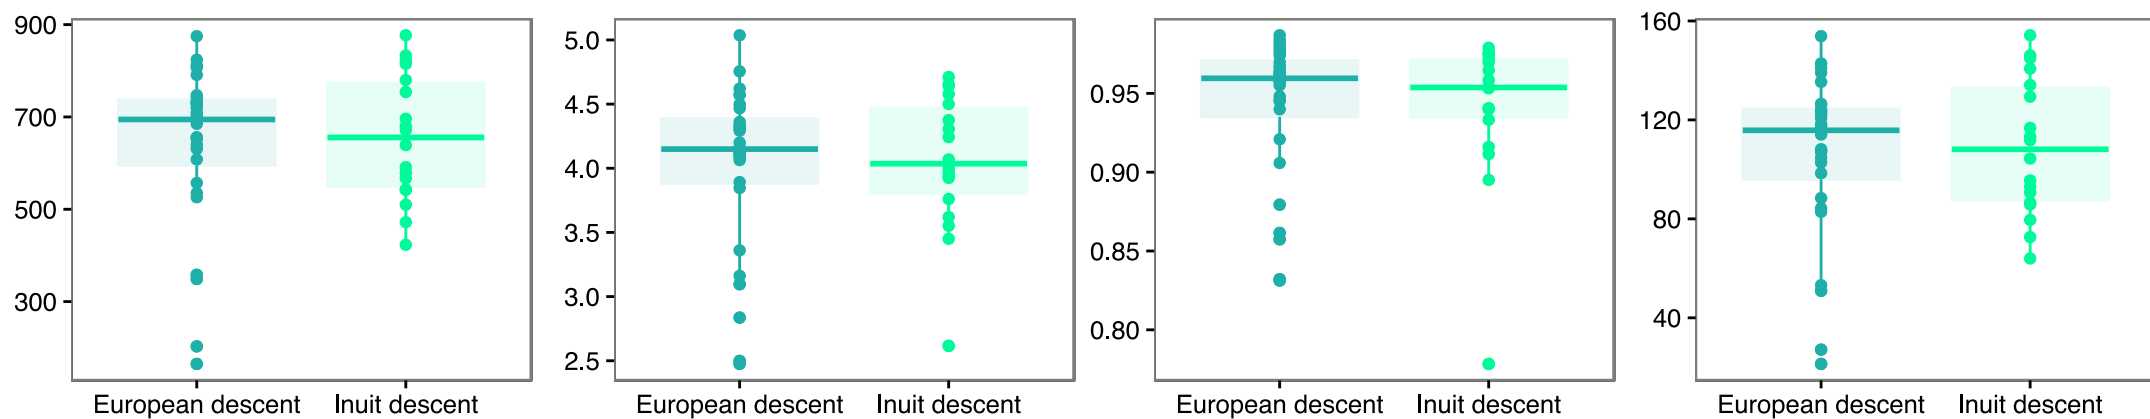

Diversity estimate
