# Supplementary material for: Gut Microbiome of the Canadian Arctic Inuit
Source: PubMed Central journal article supplement (PMC5214747; doi:10.1128/msphere.00297-16), 2017-01-04

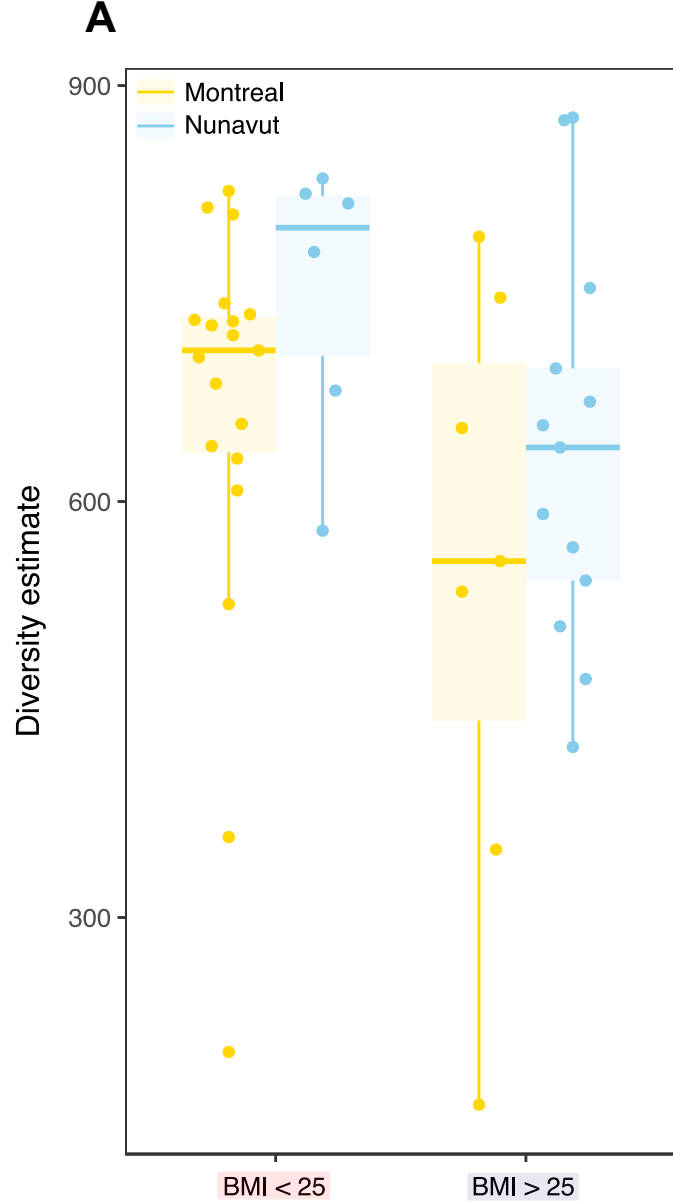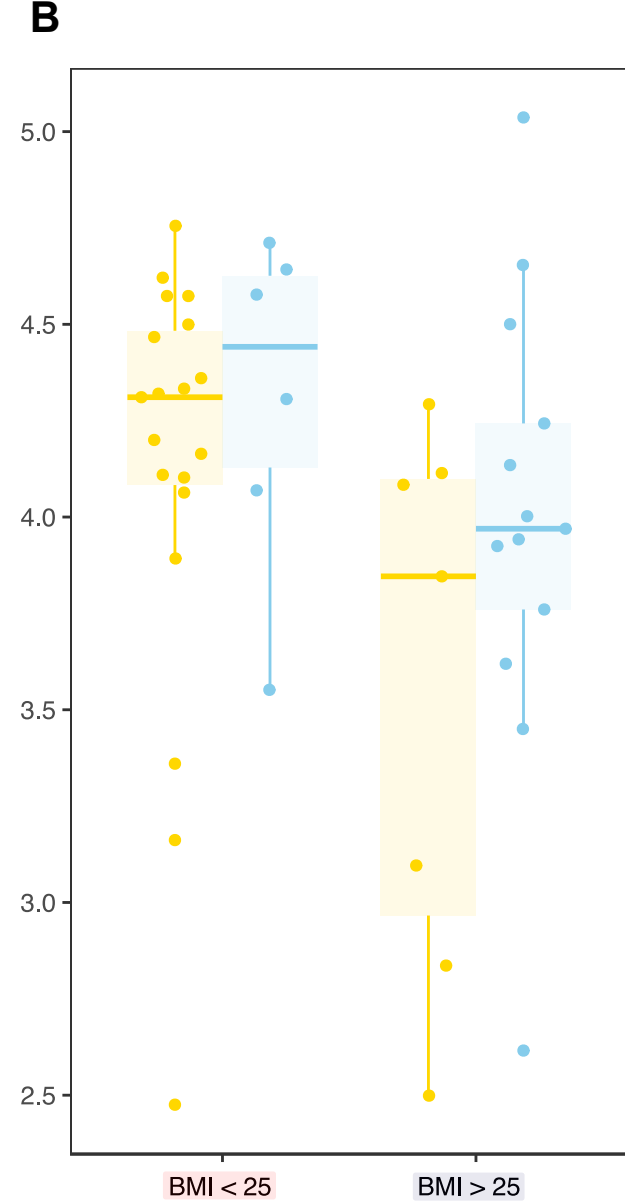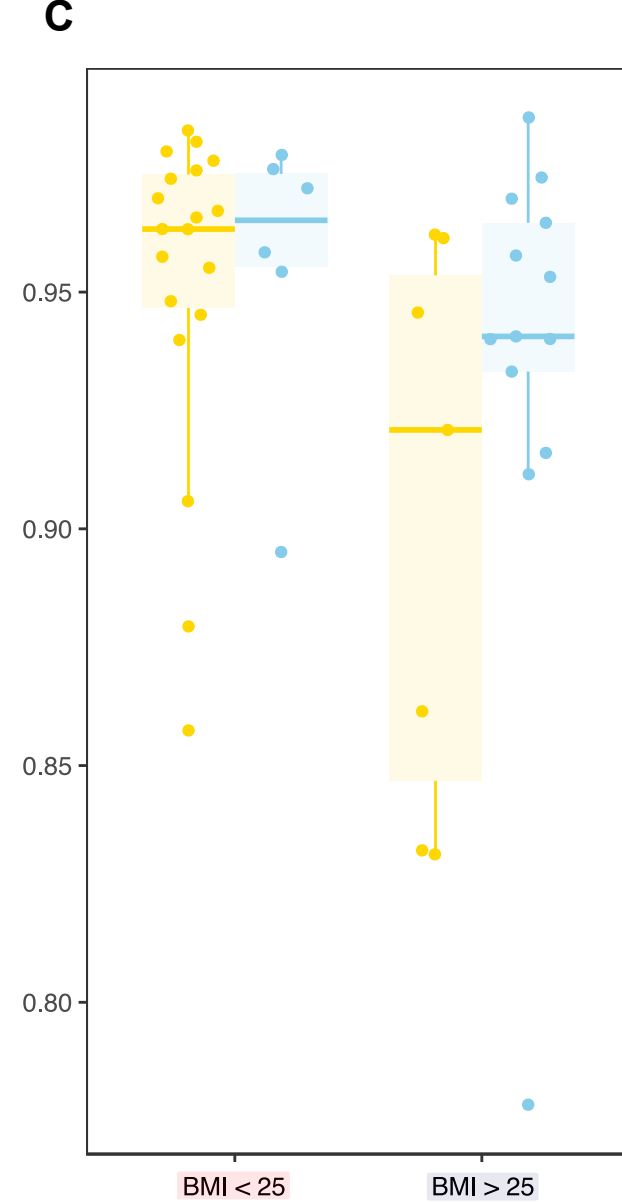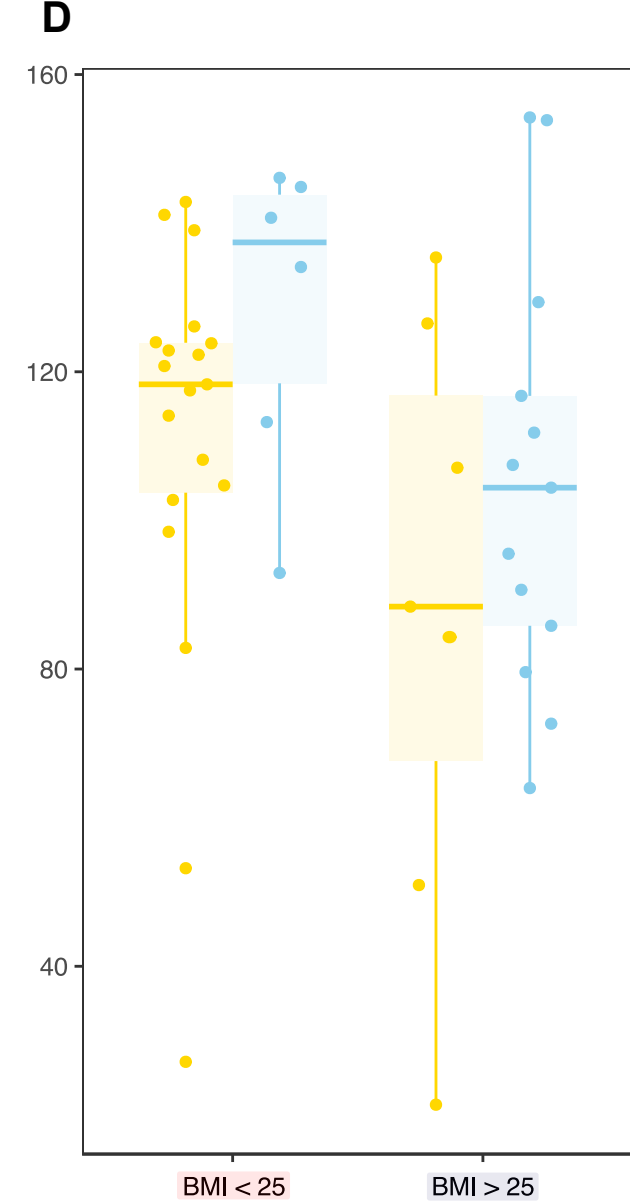

Supplement: sph001172219sf4.pdf [file sph001172219sf4.pdf]
