# Supplementary material for: Gut Microbiome of the Canadian Arctic Inuit
Source: PubMed Central journal article supplement (PMC5214747; doi:10.1128/msphere.00297-16), 2017-01-04

# COMPARISONS

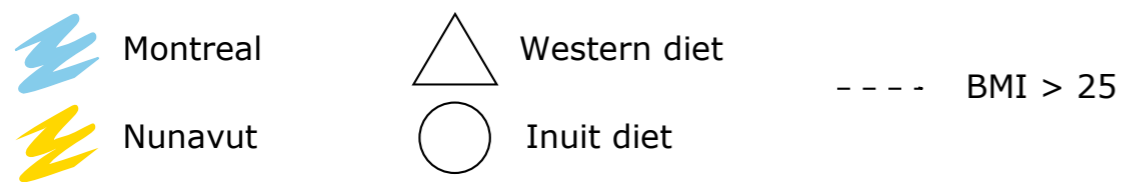

## A. Geography

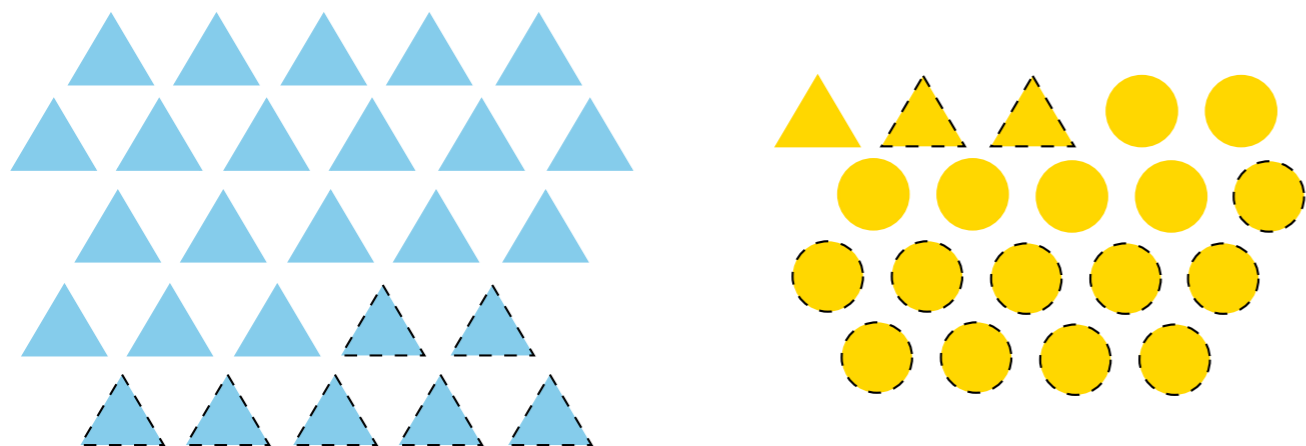

## B. Diet

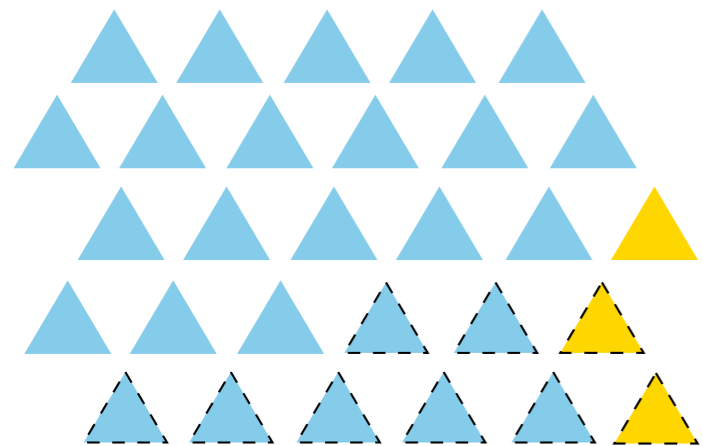

## C. BMI

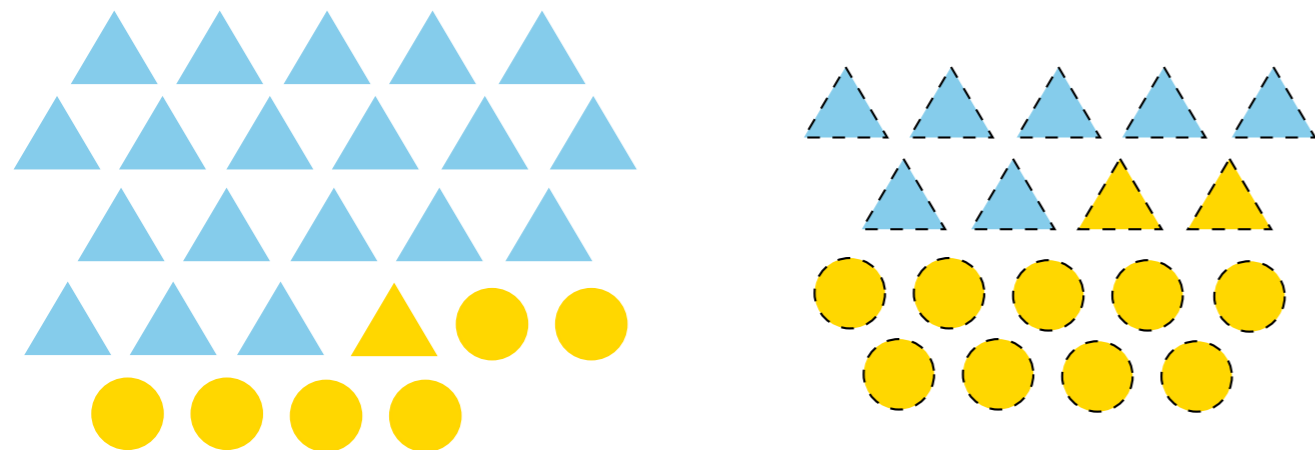

## D. OTU associations

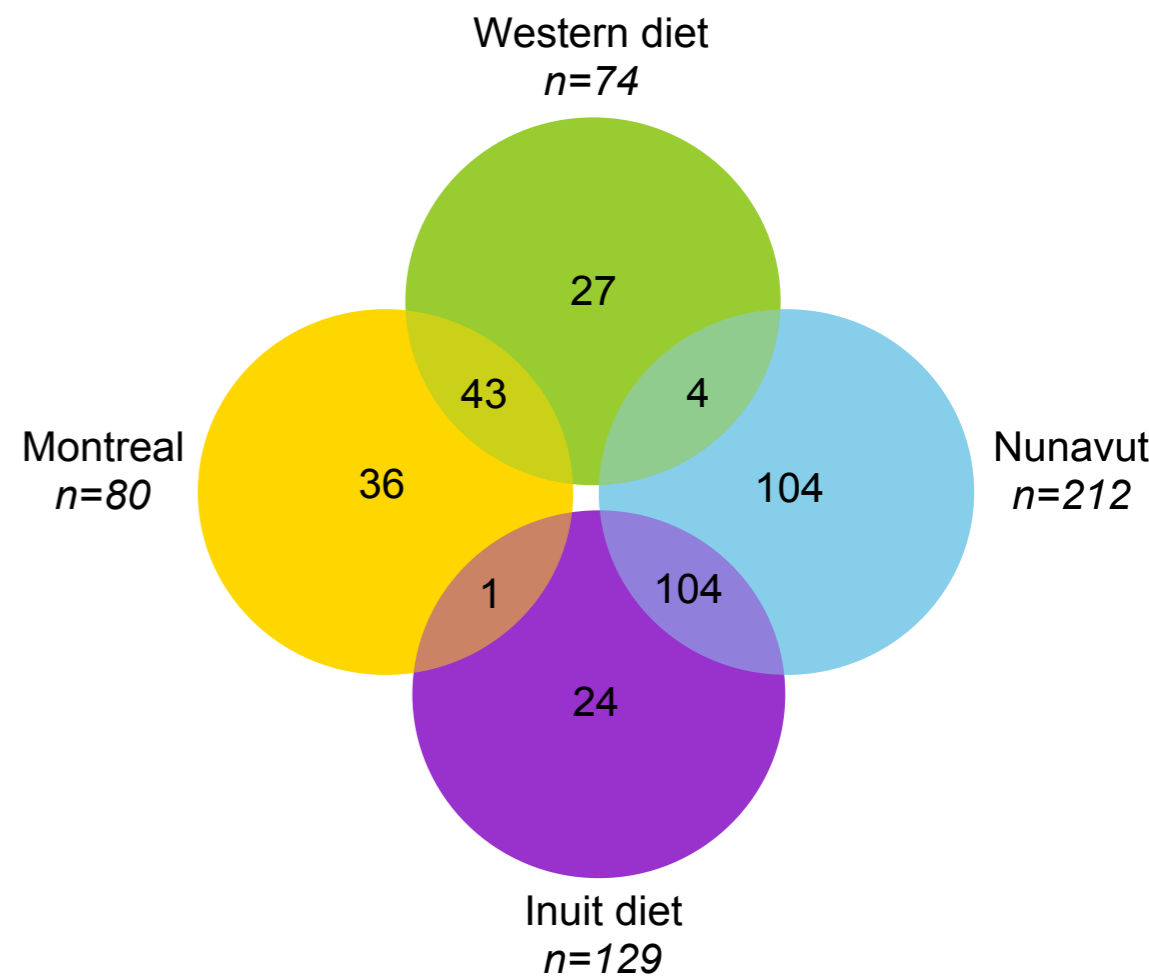

Supplement: sph001172219sf7.pdf [file sph001172219sf7.pdf]
